# Supplementary material for: Cytotoxicity of multifunctional surfactant containing capped mesoporous silica nanoparticles
Source: Royal Society of Chemistry journal article supplement (doi:10.1039/c5ra21722a), 2016-01-01
Supplement: c5ra21722a1.pdf [file c5ra21722a1.pdf]

## Electronic Supporting Information (ESI)

### Cytotoxicity of multifunctional surfactant containing capped mesoporous silica nanoparticles†

Adem Yildirim,<sup>‡\*ab</sup> Muge Turkaydin,<sup>c</sup> Bora Garipcan<sup>c</sup> and Mehmet Bayindir<sup>\*abd</sup>

<sup>a</sup>UNAM-National Nanotechnology Research Center, Bilkent University, 06800 Ankara, Turkey,  
Email: yildirim.adem83@gmail.com (A. Y.)

<sup>b</sup>Institute of Materials Science and Nanotechnology, Bilkent University, 06800 Ankara, Turkey,  
E-mail: bayindir@nano.org.tr. Phone: +90 312 2903500. Fax: +90 312 266 4365 (M. B.)

<sup>c</sup>Institute of Biomedical Engineering, Bogazici University, 34684 İstanbul, Turkey <sup>d</sup>Department of Physics, Bilkent University, 06800, Ankara, Turkey

<sup>‡</sup>Present address: Department of Chemical and Biological Engineering, University of Colorado Boulder, 80309, Boulder, Colorado, United States

**Fig. S1** TEM image of surfactant extracted rMSN-ts sample.

**Fig. S2** Low magnification bright-field optical microscope images of untreated and rMSN or rMSN-ts treated cells.

**Fig. S3** Time-dependent bleaching of DPBF dye in the presence of particles and under illumination of green light.

**Table S1.** IC<sub>50</sub> values of MSNs against L2929 and MCF-7 cell lines.

## SI. Supporting Figures

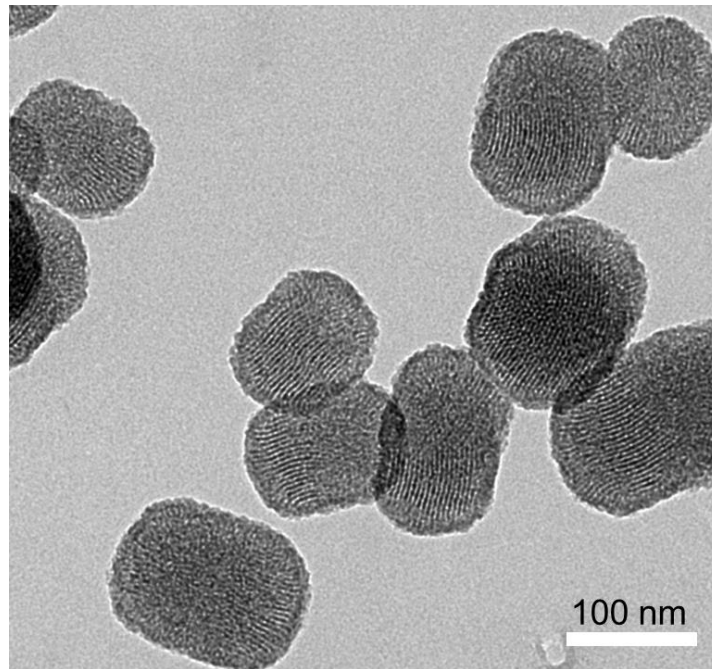

**Fig. S1** TEM image of surfactant extracted rMSN-ts sample.

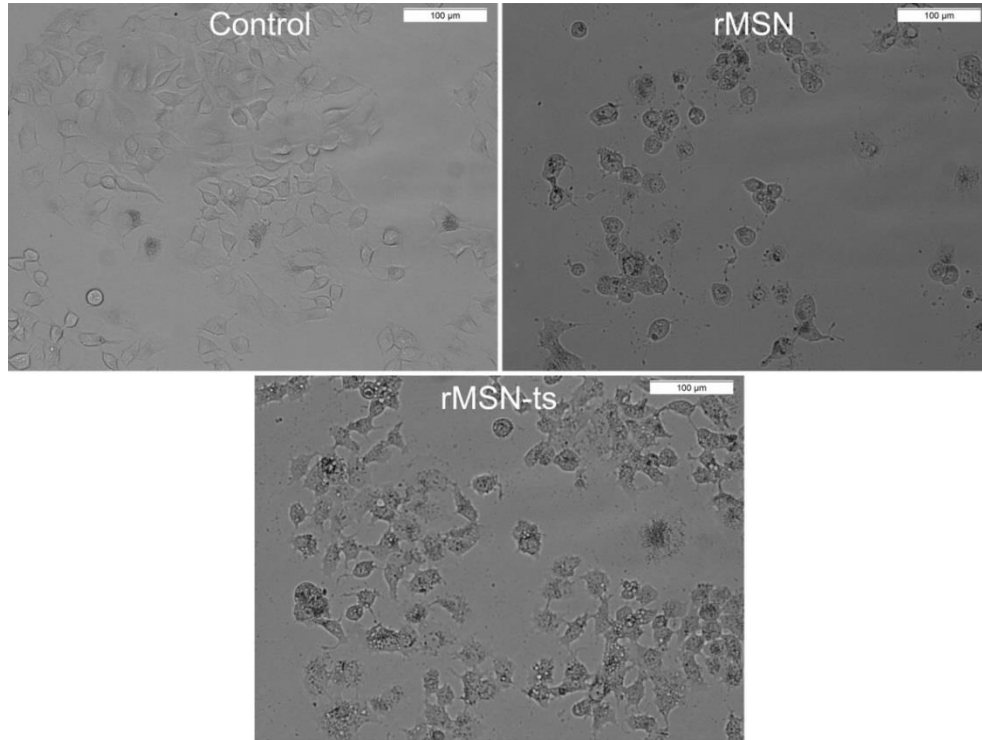

**Fig. S2** Low magnification bright-field optical microscope images of untreated and rMSN or rMSN-ts treated cells.

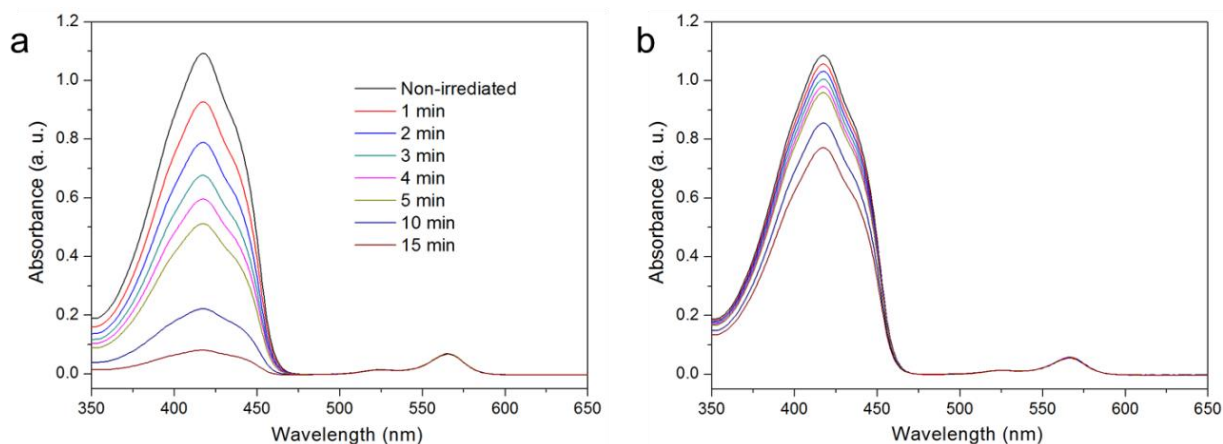

**Fig. S3** Time-dependent bleaching of DPBF dye (0.05 mM in DMSO) in the presence of (a) rMSN and (b) rMSN-ts. RB concentration was 0.5  $\mu\text{g/mL}$  for both rMSN and rMSN-ts and solutions were illuminated using an array of green LEDs.

## SII. Supporting Tables

**Table S1.**  $\text{IC}_{50}$  values of MSNs against L2929 and MCF-7 cell lines.

| Sample      | $\text{IC}_{50}$ for L2929<br>( $\mu\text{g CTAB}^a / \text{mL}$ ) | $\text{IC}_{50}$ for MCF-7<br>( $\mu\text{g CTAB}^a / \text{mL}$ ) |
|-------------|--------------------------------------------------------------------|--------------------------------------------------------------------|
| <b>4 h</b>  |                                                                    |                                                                    |
| rMSN        | 49                                                                 | 52                                                                 |
| rMSN-ts     | n/a <sup>b</sup>                                                   | n/a <sup>b</sup>                                                   |
| <b>24 h</b> |                                                                    |                                                                    |
| rMSN        | 9                                                                  | <3.5                                                               |
| rMSN-ts     | 14                                                                 | 3                                                                  |
| <b>72 h</b> |                                                                    |                                                                    |
| rMSN        | n/a <sup>c</sup>                                                   | n/a <sup>c</sup>                                                   |
| rMSN-ts     | n/a <sup>c</sup>                                                   | n/a <sup>c</sup>                                                   |
|             | $\text{IC}_{50}$ for L2929<br>( $\mu\text{g MSN} / \text{mL}$ )    | $\text{IC}_{50}$ for MCF-7<br>( $\mu\text{g MSN} / \text{mL}$ )    |
| <b>4 h</b>  |                                                                    |                                                                    |
| rMSN-ex     | n/a <sup>b</sup>                                                   | n/a <sup>b</sup>                                                   |
| <b>24 h</b> |                                                                    |                                                                    |
| rMSN-ex     | n/a <sup>b</sup>                                                   | n/a <sup>b</sup>                                                   |
| <b>72 h</b> |                                                                    |                                                                    |
| rMSN-ex     | 161                                                                | 121                                                                |

<sup>a</sup>CTAB amount in the MSNs, <sup>b</sup>Above the studied concentration region, <sup>c</sup>Below the studied concentration region.
